# Supplementary material
Source: publisher figshare collection journal article supplement (https://karger.figshare.com/ndownloader/files/17682143)
Supplement: Supplementary file 1 [file 17682143]

**Submission Statement****Article Title:**

"Clinical approach to sodium homeostasis disorders in children affected by pituitary-suprasellar tumors" NEN-2019-4-5

**Every author** must sign 1 copy of this Submission Statement with his/her original signature.

In signing the Submission Statement, the authors confirm that they have read and agreed to the full submission statement below, including that

- the submission is original and has not been previously published
- all permissions have been obtained
- the manuscript includes all the relevant statements and acknowledgements
- the copyright is transferred to S. Karger AG on acceptance

| Printed Name:      | E-Mail:                           | Signature:                                                                           | Place and Date: |
|--------------------|-----------------------------------|--------------------------------------------------------------------------------------|-----------------|
| Gerdi Tuli         | gtuli@unito.it                    |  | Turin, 29/07/19 |
| Patrizia Matarazzo | pmatarazzo@cittadellasalute.to.it |  | Turin, 29/07/19 |
| Luisa de Sanctis   | luisa.desanctis@unito.it          |  | Turin, 29/07/19 |
|                    |                                   |                                                                                      |                 |
|                    |                                   |                                                                                      |                 |
|                    |                                   |                                                                                      |                 |

Please print and sign the form, and upload it during submission or fax or e-mail it to:

Editorial Office *Neuroendocrinology*  
Prof. Dr. Robert Millar  
79 Louis Braille Way  
Gorebridge  
Midlothian EH23 4LD (UK)  
**E-Mail:** editor@nen-edinburgh.org
